# Supplementary material
Source: publisher figshare collection journal article supplement (https://geolsoc.figshare.com/ndownloader/files/24737224)
Supplement: Supplementary file 1 [file 24737224]

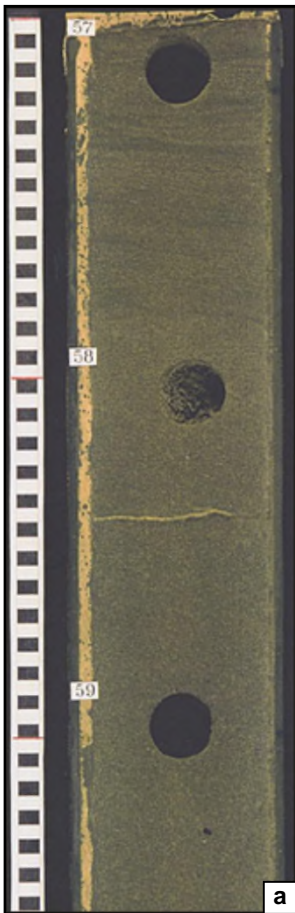

Massive sandstone

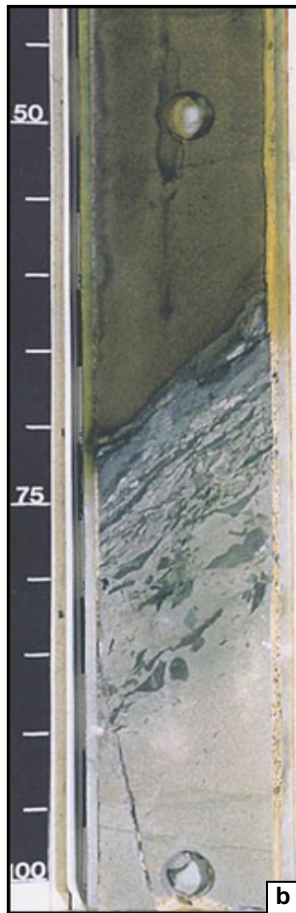

Linked debrite

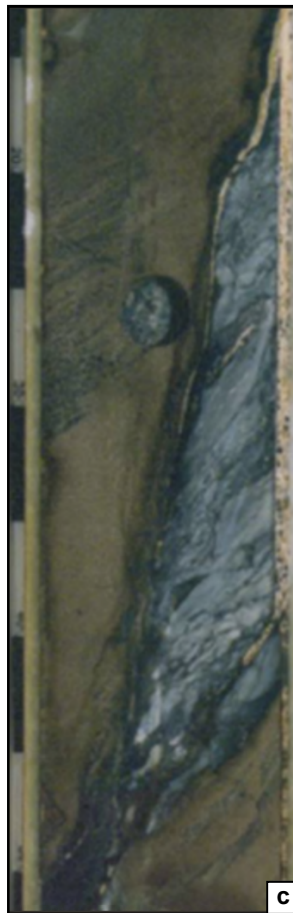

Minor sand injections

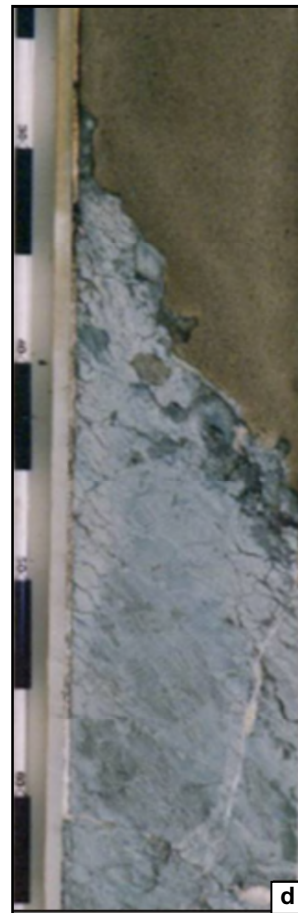

Hemipelagic shales

**Supplementary material 2.** Core photos of the dominant reservoir lithofacies within the Donan and Lochranza fields (after [Ings \*et al.\* 2015](#)).
